# Supplementary material for: Optimization of plasmonic metal structures for improving the hydrogen production efficiency of metal–organic frameworks
Source: Royal Society of Chemistry journal article supplement (doi:10.1039/d1nr01197a), 2021-01-01
Supplement: d1nr01197a1.pdf [file d1nr01197a1.pdf]

## Supporting Information

### Optimizing plasmonic metal structure for improving the hydrogen production efficiency of metal-organic frameworks

Wei Zhang<sup>1</sup>, Yang Wang<sup>1,2\*</sup>, Jianping Guo<sup>3</sup>, Yu Yu<sup>1</sup>, Wubiao Duan<sup>1</sup>, Yang Yang<sup>1</sup>, Xue Bai<sup>1</sup>, Bo  
Liu<sup>1\*</sup>

*1. Department of Chemistry, School of Science, Beijing Jiaotong University, Beijing 100044,  
People's Republic of China;*

*2. College of Materials Science and Opto-electronic Technology, CAS Center for Excellence in  
Topological Quantum Computation & Center of Materials Science and Optoelectronics  
Engineering, University of Chinese Academy of Sciences, Yanqi Lake, Huairou District, Beijing  
101408, People's Republic of China;*

*3. State Key Laboratory of Solid Waste Reuse for Building Materials, Beijing Building Materials  
Academy of Science Research, Beijing 100041, People's Republic of China.*

\*Corresponding authors.

E-mail: yangwang6270@gmail.com (Y. Wang, ORCID: 0000-0002-2365-5064);

boliu@bjtu.edu.cn (B. Liu).

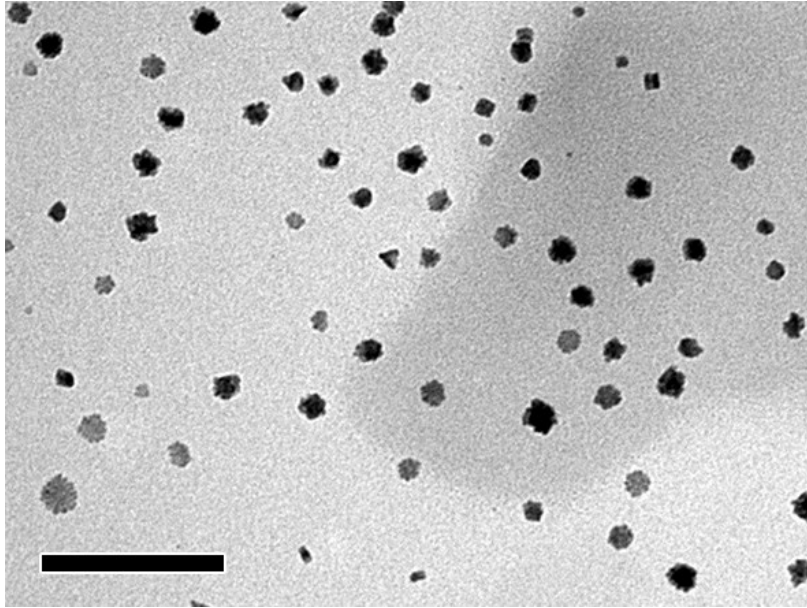

**Figure S1.** TEM images of Au nanoparticles prepared by reducing the length of Au NR<sub>67</sub> with 10 mM HAuCl<sub>4</sub> (3.7 mL). Scale bars: 200 nm.

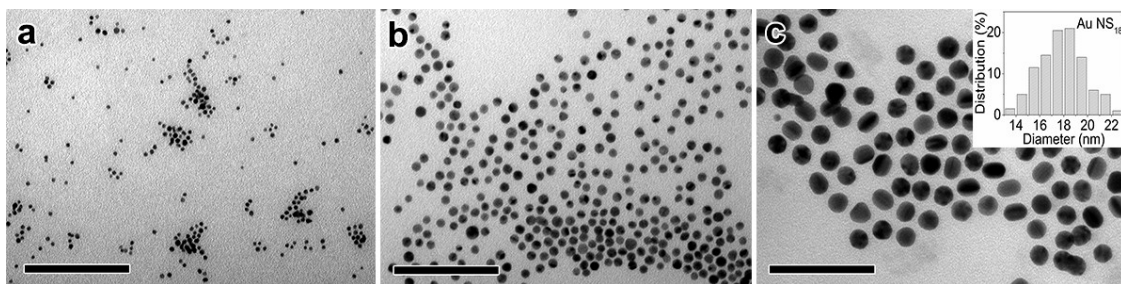

**Figure S2.** TEM images of (a) seeds A, (b) seeds B and (c) Au NS<sub>18</sub> (inset c is size distribution of Au NS<sub>18</sub>). Scale bars: 100 nm.

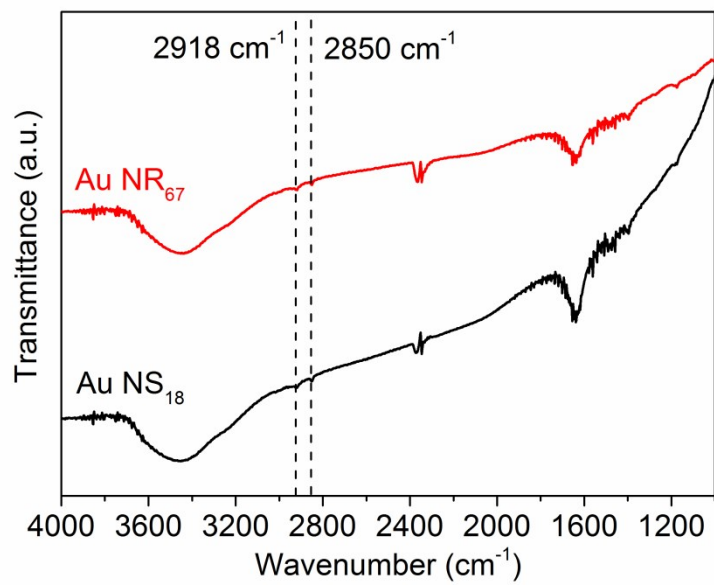

**Figure S3.** FT-IR spectra of  $\text{Au NR}_{67}$  and  $\text{Au NS}_{18}$ .

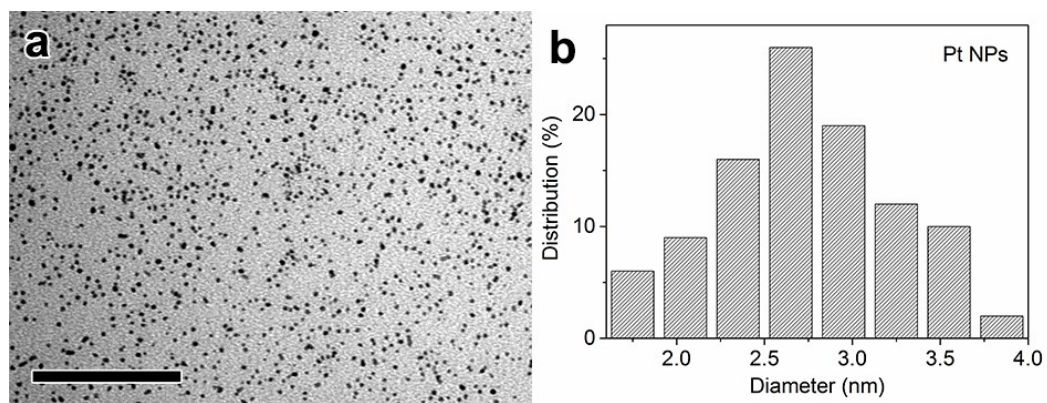

**Figure S4.** (a) TEM images of Pt NPs and (b) size distribution of Pt NPs. Scale bars: 100 nm.

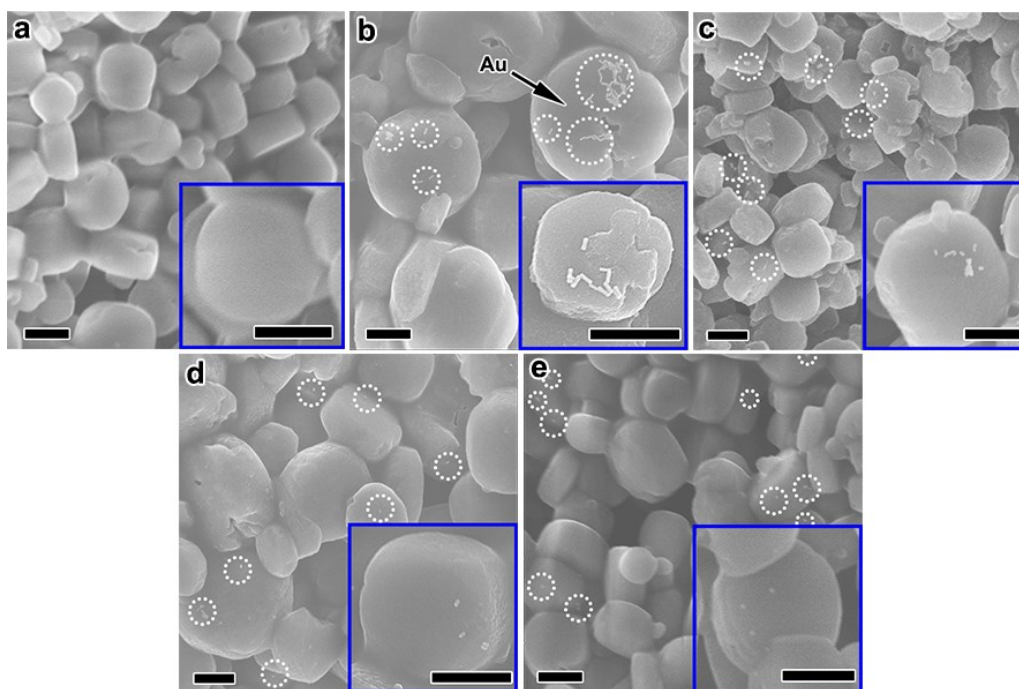

**Figure S5.** SEM images of as-prepared samples. (a) Pt@MIL-125, (b) Pt@MIL-125/Au NR<sub>67</sub>, (c) Pt@MIL-125/Au NR<sub>52</sub>, (d) Pt@MIL-125/Au NR<sub>38</sub> and (e) Pt@MIL-125/Au NS<sub>18</sub>. Scale bars: 500 nm. Insets are the corresponding single particle of each sample.

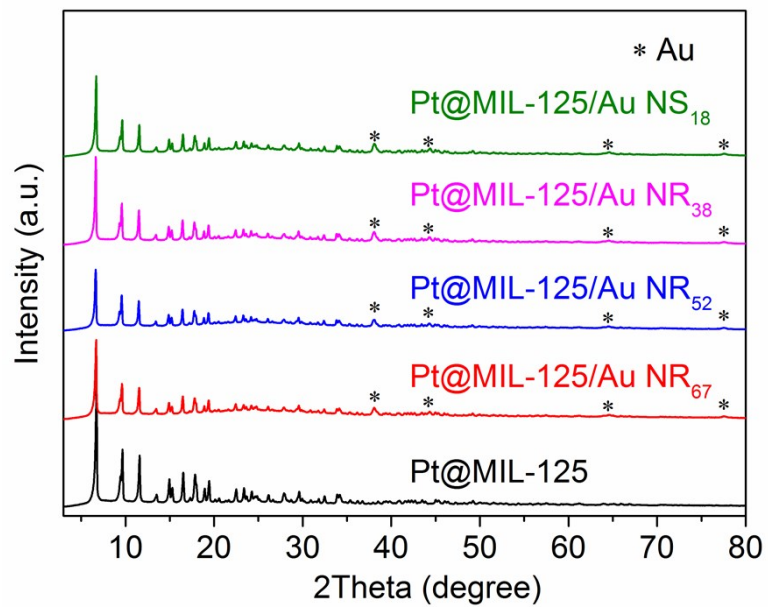

**Figure S6.** Powder XRD patterns of Pt@MIL-125, Pt@MIL-125/Au NR<sub>67</sub>, Pt@MIL-125/Au NR<sub>52</sub>, Pt@MIL-125/Au NR<sub>38</sub> and Pt@MIL-125/Au NS<sub>18</sub>.

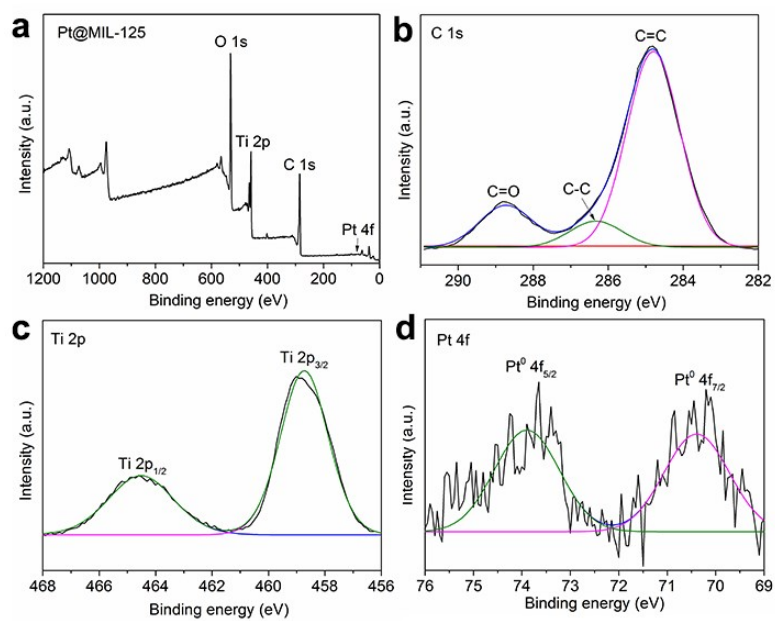

**Figure S7.** The XPS spectra for (a) wide scan, (b) C 1s, (c) Ti 2p and (d) Pt 4f of Pt@MIL-

125, no Au element can be detected.



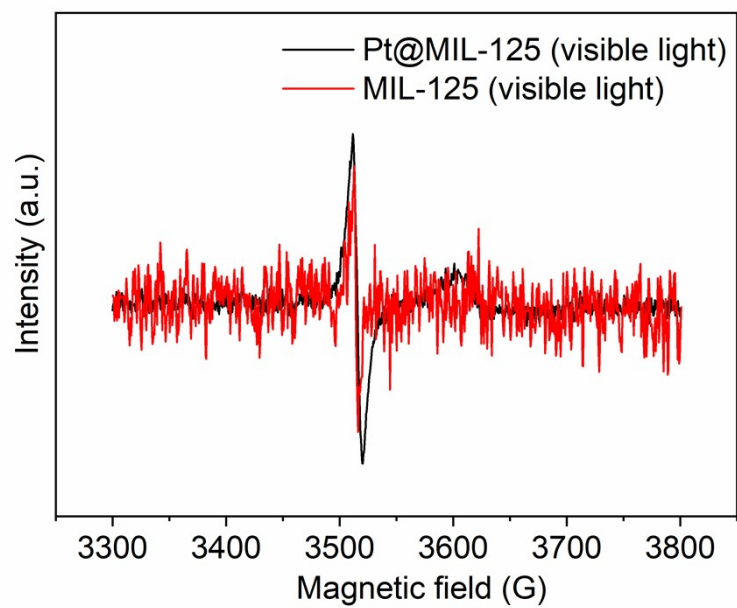

**Figure S8.** ESR spectra of Pt@MIL-125 and MIL-125 observed under visible light irradiation (> 420 nm) for 600 s.

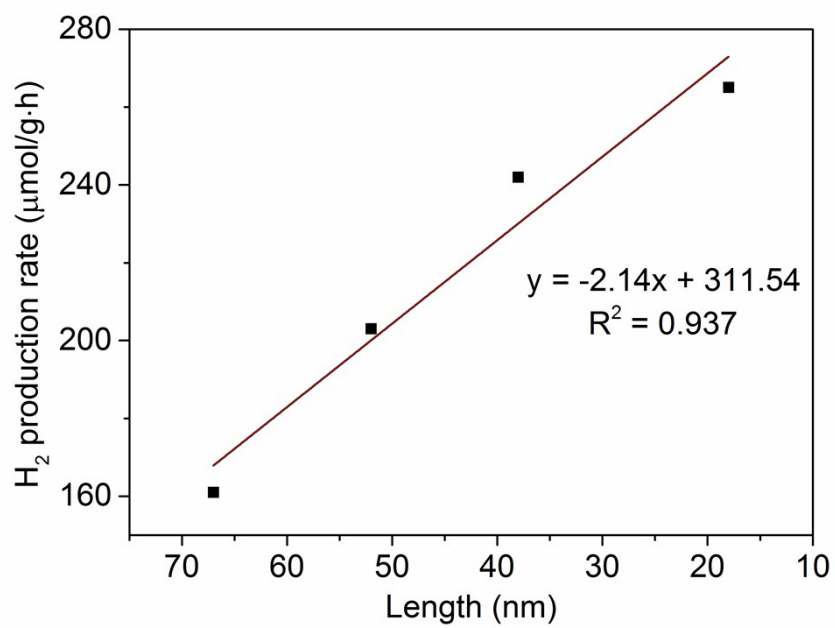

**Figure S9.** The relationship between the length of rod and H<sub>2</sub> generation performance of

Pt@MIL-125/Au samples.

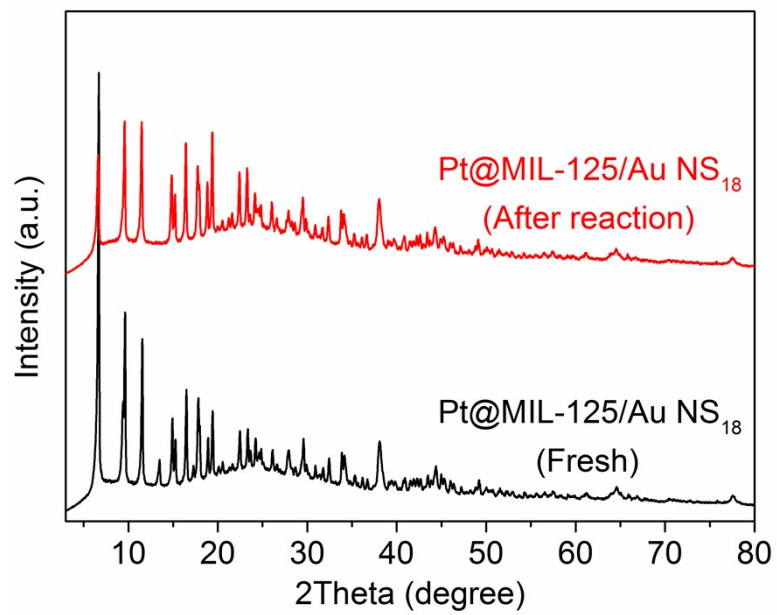

**Figure S10.** Powder XRD patterns of Pt@MIL-125/Au NS<sub>18</sub> before and after 4 cycles.
